# Supplementary material
Source: PubMed Central journal article supplement (PMC2752555)
Supplement: 0903341106_0903341106SI.pdf [file 0903341106_0903341106SI.pdf]

# Supporting Information

DeGiorgio et al. 10.1073/pnas.0903341106

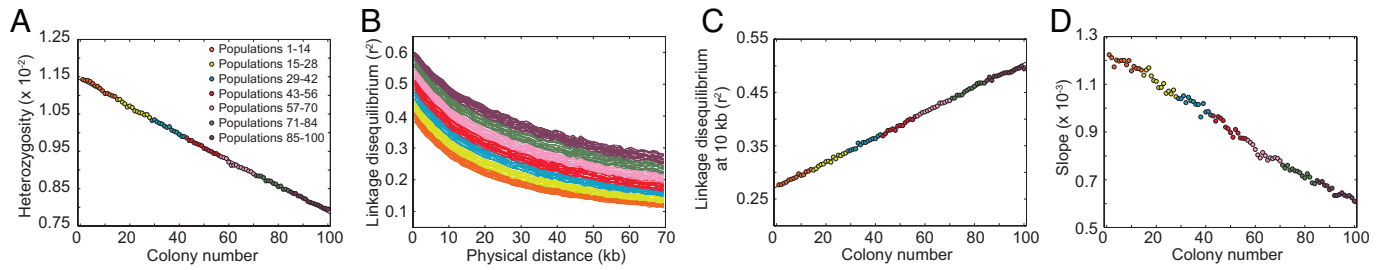

**Fig. S1.** Patterns of heterozygosity, LD, and the ancestral allele frequency spectrum in simulations of the serial founder model with symmetric migration at rate  $M = 1$  between neighboring populations. All other parameters are the same as in Fig. 3.

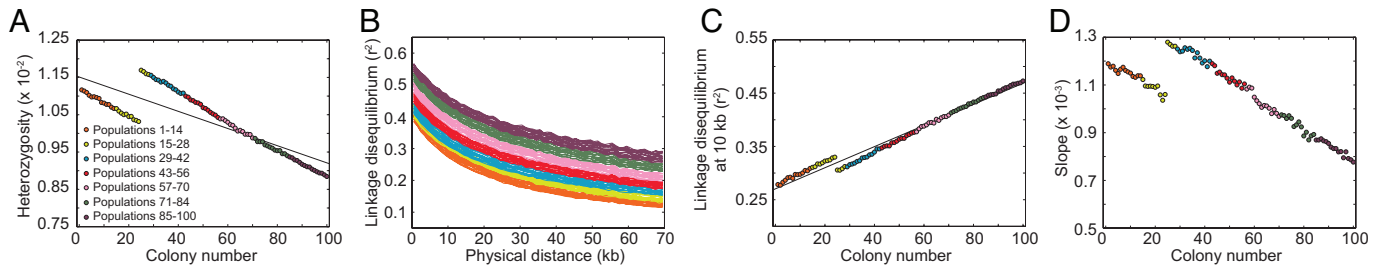

**Fig. S2.** Patterns of heterozygosity, LD, and the ancestral allele frequency spectrum in simulations of the serial founder model with archaic admixture. The model incorporates archaic admixture with an admixture fraction  $\gamma = 0.1$  of population 25 deriving from the archaic population. All other parameters are the same as in Fig. 3.

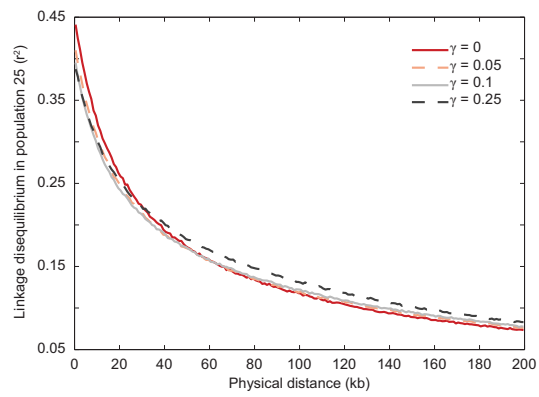

**Fig. S3.** LD ( $r^2$ ) as a function of physical distance for population 25 in the serial founder model with archaic admixture at rate  $\gamma$ . The simulation proceeded in the same way as in Fig. 5, except that longer regions were simulated (1 Mb).

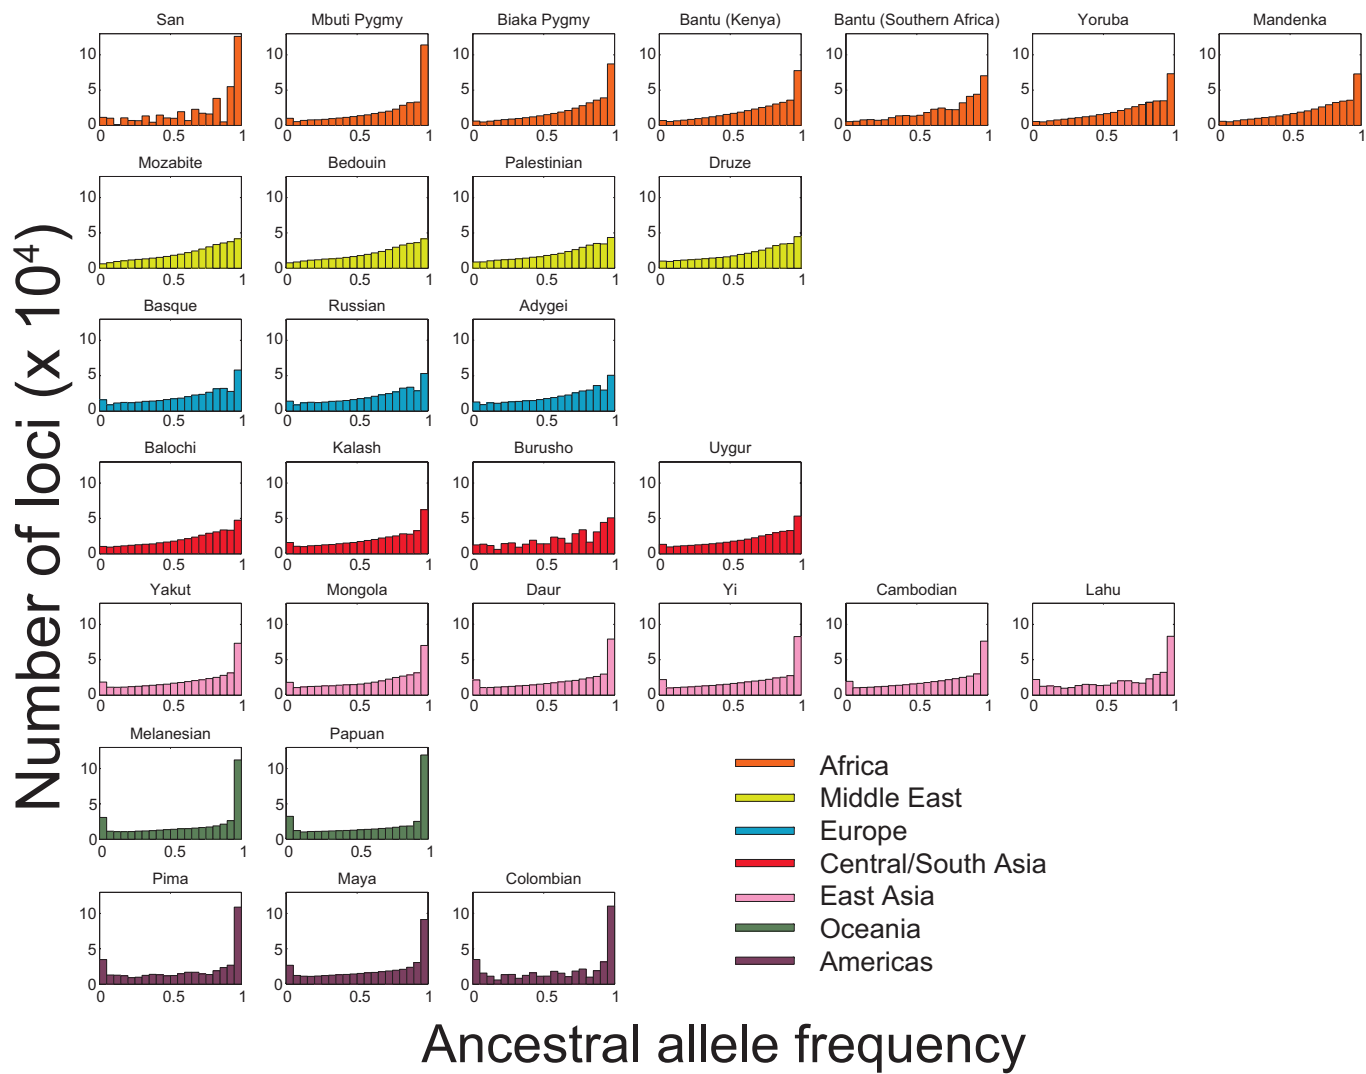

Fig. 54. Ancestral allele frequency spectra calculated using a resampling technique applied to the data of Jakobsson M, et al. (2008) *Nature* 451:998–1003.

## Other Supporting Information Files

[SI Appendix](#)
