# Supplementary material
Source: PubMed Central journal article supplement (PMC2752555)
Supplement: 0903341106_Appendix_PDF.pdf [file 0903341106_Appendix_PDF.pdf]

-em 0.0105 81 80 0 -ej 0.0105 81 80 -en 0.010975 80 0.025 -em 0.011025 79 80 0 -em 0.011025 80 79 0 -ej 0.011025 80 79 -en 0.0115 79 0.025 -em 0.01155 78 79 0 -em 0.01155 79 78 0 -ej 0.01155 79 78 -en 0.012025 78 0.025 -em 0.012075 77 78 0 -em 0.012075 78 77 0 -ej 0.012075 78 77 -en 0.01255 77 0.025 -em 0.0126 76 77 0 -em 0.0126 77 76 0 -ej 0.0126 77 76 -en 0.013075 76 0.025 -em 0.013125 75 76 0 -em 0.013125 76 75 0 -ej 0.013125 76 75 -en 0.0136 75 0.025 -em 0.01365 74 75 0 -em 0.01365 75 74 0 -ej 0.01365 75 74 -en 0.014125 74 0.025 -em 0.014175 73 74 0 -em 0.014175 74 73 0 -ej 0.014175 74 73 -en 0.01465 73 0.025 -em 0.0147 72 73 0 -em 0.0147 73 72 0 -ej 0.0147 73 72 -en 0.015175 72 0.025 -em 0.015225 71 72 0 -em 0.015225 72 71 0 -ej 0.015225 72 71 -en 0.0157 71 0.025 -em 0.01575 70 71 0 -em 0.01575 71 70 0 -ej 0.01575 71 70 -en 0.016225 70 0.025 -em 0.016275 69 70 0 -em 0.016275 70 69 0 -ej 0.016275 70 69 -en 0.01675 69 0.025 -em 0.0168 68 69 0 -em 0.0168 69 68 0 -ej 0.0168 69 68 -en 0.017275 68 0.025 -em 0.017325 67 68 0 -em 0.017325 68 67 0 -ej 0.017325 68 67 -en 0.0178 67 0.025 -em 0.01785 66 67 0 -em 0.01785 67 66 0 -ej 0.01785 67 66 -en 0.018325 66 0.025 -em 0.018375 65 66 0 -em 0.018375 66 65 0 -ej 0.018375 66 65 -en 0.01885 65 0.025 -em 0.0189 64 65 0 -em 0.0189 65 64 0 -ej 0.0189 65 64 -en 0.019375 64 0.025 -em 0.019425 63 64 0 -em 0.019425 64 63 0 -ej 0.019425 64 63 -en 0.0199 63 0.025 -em 0.01995 62 63 0 -em 0.01995 63 62 0 -ej 0.01995 63 62 -en 0.020425 62 0.025 -em 0.020475 61 62 0 -em 0.020475 62 61 0 -ej 0.020475 62 61 -en 0.02095 61 0.025 -em 0.021 60 61 0 -em 0.021 61 60 0 -ej 0.021 61 60 -en 0.021475 60 0.025 -em 0.021525 59 60 0 -em 0.021525 60 59 0 -ej 0.021525 60 59 -en 0.022 59 0.025 -em 0.02205 58 59 0 -em 0.02205 59 58 0 -ej 0.02205 59 58 -en 0.022525 58 0.025 -em 0.022575 57 58 0 -em 0.022575 58 57 0 -ej 0.022575 58 57 -en 0.02305 57 0.025 -em 0.0231 56 57 0 -em 0.0231 57 56 0 -ej 0.0231 57 56 -en 0.023575 56 0.025 -em 0.023625 55 56 0 -em 0.023625 56 55 0 -ej 0.023625 56 55 -en 0.0241 55 0.025 -em 0.02415 54 55 0 -em 0.02415 55 54 0 -ej 0.02415 55 54 -en 0.024625 54 0.025 -em 0.024675 53 54 0 -em 0.024675 54 53 0 -ej 0.024675 54 53 -en 0.02515 53 0.025 -em 0.0252 52 53 0 -em 0.0252 53 52 0 -ej 0.0252 53 52 -en 0.025675 52 0.025 -em 0.025725 51 52 0 -em 0.025725 52 51 0 -ej 0.025725 52 51 -en 0.0262 51 0.025 -em 0.02625 50 51 0 -em 0.02625 51 50 0 -ej 0.02625 51 50 -en 0.026725 50 0.025 -em 0.026775 49 50 0 -em 0.026775 50 49 0 -ej 0.026775 50 49 -en 0.02725 49 0.025 -em 0.0273 48 49 0 -em 0.0273 49 48 0 -ej 0.0273 49 48 -en 0.027775 48 0.025 -em 0.027825 47 48 0 -em 0.027825 48 47 0 -ej 0.027825 48 47 -en 0.0283 47 0.025 -em 0.02835 46 47 0 -em 0.02835 47 46 0 -ej 0.02835 47 46 -en 0.028825 46 0.025 -em 0.028875 45 46 0 -em 0.028875 46 45 0 -ej 0.028875 46 45 -en 0.02935 45 0.025 -em 0.0294 44 45 0 -em 0.0294 45 44 0 -ej 0.0294 45 44 -en 0.029875 44 0.025 -em 0.029925 43 44 0 -em 0.029925 44 43 0 -ej 0.029925 44 43 -en 0.0304 43 0.025 -em 0.03045 42 43 0 -em 0.03045 43 42 0 -ej 0.03045 43 42 -en 0.030925 42 0.025 -em 0.030975 41 42 0 -em 0.030975 42 41 0 -ej 0.030975 42 41 -en 0.03145 41 0.025 -em 0.0315 40 41 0 -em 0.0315 41 40 0 -ej 0.0315 41 40 -en 0.031975 40 0.025 -em 0.032025 39 40 0 -em 0.032025 40 39 0 -ej 0.032025 40 39 -en 0.0325 39 0.025 -em 0.03255 38 39 0 -em 0.03255 39 38 0 -ej 0.03255 39 38 -en 0.033025 38 0.025 -em 0.033075 37 38 0 -em 0.033075 38 37 0 -ej 0.033075 38 37 -en 0.03355 37 0.025 -em 0.0336 36 37 0 -em 0.0336 37 36 0 -ej 0.0336 37 36 -en 0.034075 36 0.025 -em 0.034125 35 36 0 -em 0.034125 36 35 0 -ej 0.034125 36 35 -en 0.0346 35 0.025 -em 0.03465 34 35 0 -em 0.03465 35 34 0 -ej 0.03465 35 34 -en 0.035125 34 0.025 -em 0.035175 33 34 0 -em 0.035175 34 33 0 -ej 0.035175 34 33 -en 0.03565 33 0.025 -em 0.0357 32 33 0 -em 0.0357 33 32 0 -ej 0.0357 33 32 -en 0.036175 32 0.025 -em 0.036225 31 32 0 -em 0.036225 32 31 0 -ej 0.036225 32 31 -en 0.0367 31 0.025 -em 0.03675 30 31 0 -em 0.03675 31 30 0 -ej 0.03675 31 30 -en 0.037225 30 0.025 -em 0.037275 29 30 0 -em 0.037275 30 29 0 -ej 0.037275 30 29 -en 0.03775 29 0.025 -em 0.0378 28 29 0 -em 0.0378 29 28 0 -ej 0.0378 29 28 -en 0.038275 28 0.025 -em 0.038325 27 28 0 -em 0.038325 28 27 0 -ej 0.038325 28 27 -en 0.0388 27 0.025 -em 0.03885 26 27 0 -em 0.03885 27 26 0 -ej 0.03885 27 26 -en 0.039325 26 0.025 -em 0.039375 25 26 0 -em 0.039375 26 25 0 -ej 0.039375 26 25 -en 0.03985 25 0.025 -em 0.0399 24 25 0 -em 0.0399 25 24 0 -ej 0.0399 25 24 -en 0.040375 24 0.025 -em 0.040425 23 24 0 -em 0.040425 24 23 0 -ej 0.040425 24 23 -en 0.0409 23 0.025 -em 0.04095 22 23 0 -em 0.04095 23 22 0 -ej 0.04095 23 22 -en 0.041425 22 0.025 -em 0.041475 21 22 0 -em 0.041475 22 21 0 -ej 0.041475 22 21 -en 0.04195 21 0.025 -em 0.042 20 21 0 -em 0.042 21 20 0 -ej 0.042 21 20 -en 0.042475 20 0.025 -em 0.042525 19 20 0 -em 0.042525 20 19 0 -ej 0.042525 20 19 -en 0.043 19 0.025 -em 0.04305 18 19 0 -em 0.04305 19 18 0 -ej 0.04305 19 18 -en 0.043525 18 0.025 -em 0.043575 17 18 0 -em 0.043575 18 17 0 -ej 0.043575 18 17 -en 0.04405 17 0.025 -em 0.0441 16 17 0 -em 0.0441 17 16 0 -ej 0.0441 17 16 -en 0.044575 16 0.025 -em 0.044625 15 16 0 -em 0.044625 16 15 0 -ej 0.044625 16 15 -en 0.0451 15 0.025 -em 0.04515 14 15 0 -em 0.04515 15 14 0 -ej 0.04515 15 14 -en 0.045625 14 0.025 -em 0.045675 13 14 0 -em 0.045675 14 13 0 -ej 0.045675 14 13 -en 0.04615 13 0.025 -em 0.0462 12 13 0 -em 0.0462 13 12 0 -ej 0.0462 13 12 -en 0.046675 12 0.025 -em 0.046725 11 12 0 -em 0.046725 12 11 0 -ej 0.046725 12 11 -en 0.0472 11 0.025 -em 0.04725 10 11 0 -em 0.04725 11 10 0 -ej 0.04725 11 10 -en 0.047725 10 0.025 -em 0.047775 9 10 0 -em 0.047775 10 9 0 -ej 0.047775 10 9 -en 0.04825 9 0.025 -em 0.0483 8 9 0 -em 0.0483 9 8 0 -ej 0.0483 9 8 -en 0.048775 8 0.025 -em 0.048825 7 8 0 -em 0.048825 8 7 0 -ej 0.048825 8 7 -en 0.0493 7 0.025 -em 0.04935 6 7 0 -em 0.04935 7 6 0 -ej 0.04935 7 6 -en 0.049825 6 0.025 -em 0.049875 5 6 0 -em 0.049875 6 5 0 -ej 0.049875 6 5 -en 0.05035 5 0.025 -em 0.0504 4 5 0 -em 0.0504 5 4 0 -ej 0.0504 5 4 -en 0.050875 4 0.025 -em 0.050925 3 4 0 -em 0.050925 4 3 0 -ej 0.050925 4 3 -en 0.0514 3 0.025 -em 0.05145 2 3 0 -em 0.05145 3 2 0 -ej 0.05145 3 2 -en 0.051925 2 0.025 -em 0.051975 1 2 0 -em 0.051975 2 1 0 -ej 0.051975 2 1

## Archaic admixture

The code below will run 5000 simulations of a serial founder model with archaic admixture. There are  $K = 100$  populations, each of diploid size  $N = 10,000$  individuals, each with a sample of  $n = 50$  chromosomes. The first founding event occurs at time  $t_D = 2,079$  generations ago (51.975 kya). The bottleneck size is  $N_b = 250$  individuals and the bottleneck length is  $L_b = 2$  generations. The interval of time between a population expansion and the next founding event is  $L = 19$  generations. The archaic population (population 101 below) has size  $N_A = 1,000$  individuals. The archaic population diverges from the modern population  $t_D^A = 16,000$  generations ago (400 kya). The admixture occurs in population 25 at time  $t_{Admix} = 1584.5$  generations ago at rate  $\gamma = 0.05$ . The population mutation rate is  $\theta = 4N\mu = 10$  and the population recombination rate is  $\rho = 4Nr = 10$ . The sequence length is 100,000 bases (100 kb). If  $t$  is a length of time in generations, then the coalescent time unit used here is  $t/(4N)$ . Admixture parameters are in red.

```
./ms 5000 5000 -t 10 -r 10 100000 -I 100 50 50 50 50 50 50 50 50 50 50 50 50 50 50 50 50 50 50 50 50 50 50 50 50 50 50 50 50 50 50 50 50 50 50 50 50 50 50 50 50 50 50 50 50 50 50 50 50 50 50 50 50 50 50 50 50 50 -en 0.000475 100 0.025 -ej 0.000525 100 99 -en 0.001 99 0.025 -ej 0.00105 99 98 -en 0.001525 98 0.025 -ej 0.001575 98 97 -en 0.00205 97 0.025 -ej 0.0021 97 96 -en 0.002575 96 0.025 -ej 0.002625 96 95 -en 0.0031 95 0.025 -ej 0.00315 95 94 -en 0.003625 94 0.025 -ej 0.003675 94 93 -en 0.00415 93 0.025 -ej 0.0042 93 92 -en 0.004675 92 0.025 -ej 0.004725 92 91 -en 0.0052 91 0.025 -ej 0.00525 91 90 -en 0.005725 90 0.025 -ej 0.005775 90 89 -en 0.00625 89 0.025 -ej 0.0063 89 88 -en 0.006775 88 0.025 -ej 0.006825 88 87 -en 0.0073 87 0.025 -ej 0.00735 87 86 -en 0.007825 86 0.025 -ej 0.007875 86 85 -en 0.00835 85 0.025 -ej 0.0084 85 84 -en 0.008875 84 0.025 -ej 0.008925 84 83 -en 0.009400 83 0.025 -ej 0.00945 83 82 -en 0.009925 82 0.025 -ej 0.009975 82 81 -en 0.01045 81 0.025 -ej 0.0105 81 80 -en 0.010975 80 0.025 -ej 0.011025 80 79 -en 0.0115 79 0.025 -ej 0.01155 79 78 -en 0.012025 78 0.025 -ej 0.012075 78 77 -en 0.01255 77 0.025 -ej 0.0126 77 76 -en 0.013075 76 0.025 -ej 0.013125 76 75 -en 0.0136 75 0.025 -ej 0.01365 75 74 -en 0.014125 74 0.025 -ej 0.014175 74 73 -en 0.01465 73 0.025 -ej 0.0147 73 72 -en 0.015175 72 0.025 -ej 0.015225 72 71 -en 0.0157 71 0.025 -ej 0.01575 71 70 -en 0.016225 70 0.025 -ej 0.016275 70 69 -en 0.01675 69 0.025 -ej 0.0168 69 68 -en 0.017275 68 0.025 -ej 0.017325 68 67 -en 0.0178 67 0.025 -ej 0.01785 67 66 -en 0.018325 66 0.025 -ej 0.018375 66 65 -en 0.01885 65 0.025 -ej 0.0189 65 64 -en 0.019375 64 0.025 -ej 0.019425 64 63 -en 0.0199 63 0.025 -ej 0.01995 63 62 -en 0.020425 62 0.025 -ej 0.020475 62 61 -en 0.02095 61 0.025 -ej 0.021 61 60 -en 0.021475 60 0.025 -ej 0.021525 60 59 -en 0.022 59 0.025 -ej 0.02205 59 58 -en 0.022525 58 0.025 -ej 0.022575 58 57 -en 0.02305 57 0.025 -ej 0.0231 57 56 -en 0.023575 56 0.025 -ej 0.023625 56 55 -en 0.0241 55 0.025 -ej 0.02415 55 54 -en 0.024625 54 0.025 -ej 0.024675 54 53 -en 0.02515 53 0.025 -ej 0.0252 53 52 -en 0.025675 52 0.025 -ej 0.025725 52 51 -en 0.0262 51 0.025 -ej 0.02625 51 50 -en 0.026725 50 0.025 -ej 0.026775 50 49 -en 0.02725 49 0.025 -ej 0.0273 49 48 -en 0.027775 48 0.025 -ej 0.027825 48 47 -en 0.0283 47 0.025 -ej 0.02835 47 46 -en 0.028825 46 0.025 -ej 0.028875 46 45 -en 0.02935 45 0.025 -ej 0.0294 45 44 -en 0.029875 44 0.025 -ej 0.029925 44 43 -en 0.0304 43 0.025 -ej 0.03045 43 42 -en 0.030925 42 0.025 -ej 0.030975 42 41 -en 0.03145 41 0.025 -ej 0.0315 41 40 -en 0.031975 40 0.025 -ej 0.032025 40 39 -en 0.0325 39 0.025 -ej 0.03255 39 38 -en 0.033025 38 0.025 -ej 0.033075 38 37 -en 0.03355 37 0.025 -ej 0.0336 37 36 -en 0.034075 36 0.025 -ej 0.034125 36 35 -en 0.0346 35 0.025 -ej 0.03465 35 34 -en 0.035125 34 0.025 -ej 0.035175 34 33 -en 0.03565 33 0.025 -ej 0.0357 33 32 -en 0.036175 32 0.025 -ej 0.036225 32 31 -en 0.0367 31 0.025 -ej 0.03675 31 30 -en 0.037225 30 0.025 -ej 0.037275 30 29 -en 0.03775 29 0.025 -ej 0.0378 29 28 -en 0.038275 28 0.025 -ej 0.038325 28 27 -en 0.0388 27 0.025 -ej 0.03885 27 26 -en 0.039325 26 0.025 -ej 0.039375 26 25 -es 0.0396125 25 0.95 -en 0.0396125 101 0.1 -en 0.03985 25 0.025 -ej 0.0399 25 24 -en 0.040375 24 0.025 -ej 0.040425 24 23 -en 0.0409 23 0.025 -ej 0.04095 23 22 -en 0.041425 22 0.025 -ej 0.041475 22 21 -en 0.04195 21 0.025 -ej 0.042 21 20 -en 0.042475 20 0.025 -ej 0.042525 20 19 -en 0.043 19 0.025 -ej 0.04305 19 18 -en 0.043525 18 0.025 -ej 0.043575 18 17 -en 0.04405 17 0.025 -ej 0.0441 17 16 -en 0.044575 16 0.025 -ej 0.044625 16 15 -en 0.0451 15 0.025 -ej 0.04515 15 14 -en 0.045625 14 0.025 -ej 0.045675 14 13 -en 0.04615 13 0.025 -ej 0.0462 13 12 -en 0.046675 12 0.025 -ej 0.046725 12 11 -en 0.0472 11 0.025 -ej 0.04725 11 10 -en 0.047725 10 0.025 -ej 0.047775 10 9 -en 0.04825 9 0.025 -ej 0.0483 9 8 -en 0.048775 8 0.025 -ej 0.048825 8 7 -en 0.0493 7 0.025 -ej 0.04935 7 6 -en 0.049825 6 0.025 -ej 0.049875 6 5 -en 0.05035 5 0.025 -ej 0.0504 5 4 -en 0.050875 4 0.025 -ej 0.050925 4 3 -en 0.0514 3 0.025 -ej 0.05145 3 2 -en 0.051925 2 0.025 -ej 0.051975 2 1 -ej 0.4 101 1
```









0.1365 75 74 0.1 -em 0.14125 74 73 1000 -em 0.14175 74 73 0.1 -em 0.1465 73 72 1000 -em 0.147 73 72 0.1 -em 0.15175 72  
71 1000 -em 0.15225 72 71 0.1 -em 0.157 71 70 1000 -em 0.1575 71 70 0.1 -em 0.16225 70 69 1000 -em 0.16275 70 69 0.1 -em  
0.1675 69 68 1000 -em 0.168 69 68 0.1 -em 0.17275 68 67 1000 -em 0.17325 68 67 0.1 -em 0.178 67 66 1000 -em 0.1785 67 66  
0.1 -em 0.18325 66 65 1000 -em 0.18375 66 65 0.1 -em 0.1885 65 64 1000 -em 0.189 65 64 0.1 -em 0.19375 64 63 1000 -em  
0.19425 64 63 0.1 -em 0.199 63 62 1000 -em 0.1995 63 62 0.1 -em 0.20425 62 61 1000 -em 0.20475 62 61 0.1 -em 0.2095 61 60  
1000 -em 0.21 61 60 0.1 -em 0.21475 60 59 1000 -em 0.21525 60 59 0.1 -em 0.22 59 58 1000 -em 0.2205 59 58 0.1 -em 0.22525  
58 57 1000 -em 0.22575 58 57 0.1 -em 0.2305 57 56 1000 -em 0.231 57 56 0.1 -em 0.23575 56 55 1000 -em 0.23625 56 55 0.1  
-em 0.241 55 54 1000 -em 0.2415 55 54 0.1 -em 0.24625 54 53 1000 -em 0.24675 54 53 0.1 -em 0.2515 53 52 1000 -em 0.252  
53 52 0.1 -em 0.25675 52 51 1000 -em 0.25725 52 51 0.1 -em 0.262 51 50 1000 -em 0.2625 51 50 0.1 -em 0.26725 50 49 1000  
-em 0.26775 50 49 0.1 -em 0.2725 49 48 1000 -em 0.273 49 48 0.1 -em 0.27775 48 47 1000 -em 0.27825 48 47 0.1 -em 0.283 47  
46 1000 -em 0.2835 47 46 0.1 -em 0.28825 46 45 1000 -em 0.28875 46 45 0.1 -em 0.2935 45 44 1000 -em 0.294 45 44 0.1 -em  
0.29875 44 43 1000 -em 0.29925 44 43 0.1 -em 0.304 43 42 1000 -em 0.3045 43 42 0.1 -em 0.30925 42 41 1000 -em 0.30975  
42 41 0.1 -em 0.3145 41 40 1000 -em 0.315 41 40 0.1 -em 0.31975 40 39 1000 -em 0.32025 40 39 0.1 -em 0.325 39 38 1000  
-em 0.3255 39 38 0.1 -em 0.33025 38 37 1000 -em 0.33075 38 37 0.1 -em 0.3355 37 36 1000 -em 0.336 37 36 0.1 -em 0.34075  
36 35 1000 -em 0.34125 36 35 0.1 -em 0.346 35 34 1000 -em 0.3465 35 34 0.1 -em 0.35125 34 33 1000 -em 0.35175 34 33 0.1  
-em 0.3565 33 32 1000 -em 0.357 33 32 0.1 -em 0.36175 32 31 1000 -em 0.36225 32 31 0.1 -em 0.367 31 30 1000 -em 0.3675  
31 30 0.1 -em 0.37225 30 29 1000 -em 0.37275 30 29 0.1 -em 0.3775 29 28 1000 -em 0.378 29 28 0.1 -em 0.38275 28 27 1000  
-em 0.38325 28 27 0.1 -em 0.388 27 26 1000 -em 0.3885 27 26 0.1 -em 0.39325 26 25 1000 -em 0.39375 26 25 0.1 -em 0.3985  
25 24 1000 -em 0.399 25 24 0.1 -em 0.40375 24 23 1000 -em 0.40425 24 23 0.1 -em 0.409 23 22 1000 -em 0.4095 23 22 0.1 -em  
0.41425 22 21 1000 -em 0.41475 22 21 0.1 -em 0.4195 21 20 1000 -em 0.42 21 20 0.1 -em 0.42475 20 19 1000 -em 0.42525 20 19  
0.1 -em 0.43 19 18 1000 -em 0.4305 19 18 0.1 -em 0.43525 18 17 1000 -em 0.43575 18 17 0.1 -em 0.4405 17 16 1000 -em 0.441  
17 16 0.1 -em 0.44575 16 15 1000 -em 0.44625 16 15 0.1 -em 0.451 15 14 1000 -em 0.4515 15 14 0.1 -em 0.45625 14 13 1000  
-em 0.45675 14 13 0.1 -em 0.4615 13 12 1000 -em 0.462 13 12 0.1 -em 0.46675 12 11 1000 -em 0.46725 12 11 0.1 -em 0.472 11  
10 1000 -em 0.4725 11 10 0.1 -em 0.47725 10 9 1000 -em 0.47775 10 9 0.1 -em 0.4825 9 8 1000 -em 0.483 9 8 0.1 -em 0.48775  
8 7 1000 -em 0.48825 8 7 0.1 -em 0.493 7 6 1000 -em 0.4935 7 6 0.1 -em 0.49825 6 5 1000 -em 0.49875 6 5 0.1 -em 0.5035 5 4  
1000 -em 0.504 5 4 0.1 -em 0.50875 4 3 1000 -em 0.50925 4 3 0.1 -em 0.514 3 2 1000 -em 0.5145 3 2 0.1 -em 0.51925 2 1 1000  
-em 0.51975 2 1 0.1 -em 10 99 100 0 -em 10 100 99 0 -ej 10 100 1 -em 10 98 99 0 -em 10 99 98 0 -ej 10 99 1 -em 10 97 98 0  
-em 10 98 97 0 -ej 10 98 1 -em 10 96 97 0 -em 10 97 96 0 -ej 10 97 1 -em 10 95 96 0 -em 10 96 95 0 -ej 10 96 1 -em 10 94 95  
0 -em 10 95 94 0 -ej 10 95 1 -em 10 93 94 0 -em 10 94 93 0 -ej 10 94 1 -em 10 92 93 0 -em 10 93 92 0 -ej 10 93 1 -em 10 91  
92 0 -em 10 92 91 0 -ej 10 92 1 -em 10 90 91 0 -em 10 91 90 0 -ej 10 91 1 -em 10 89 90 0 -em 10 90 89 0 -ej 10 90 1 -em 10  
88 89 0 -em 10 89 88 0 -ej 10 89 1 -em 10 87 88 0 -em 10 88 87 0 -ej 10 88 1 -em 10 86 87 0 -em 10 87 86 0 -ej 10 87 1 -em  
10 85 86 0 -em 10 86 85 0 -ej 10 86 1 -em 10 84 85 0 -em 10 85 84 0 -ej 10 85 1 -em 10 83 84 0 -em 10 84 83 0 -ej 10 84 1  
-em 10 82 83 0 -em 10 83 82 0 -ej 10 83 1 -em 10 81 82 0 -em 10 82 81 0 -ej 10 82 1 -em 10 80 81 0 -em 10 81 80 0 -ej 10 81  
1 -em 10 79 80 0 -em 10 80 79 0 -ej 10 80 1 -em 10 78 79 0 -em 10 79 78 0 -ej 10 79 1 -em 10 77 78 0 -em 10 78 77 0 -ej 10  
78 1 -em 10 76 77 0 -em 10 77 76 0 -ej 10 77 1 -em 10 75 76 0 -em 10 76 75 0 -ej 10 76 1 -em 10 74 75 0 -em 10 75 74 0 -ej  
10 75 1 -em 10 73 74 0 -em 10 74 73 0 -ej 10 74 1 -em 10 72 73 0 -em 10 73 72 0 -ej 10 73 1 -em 10 71 72 0 -em 10 72 71 0  
-ej 10 72 1 -em 10 70 71 0 -em 10 71 70 0 -ej 10 71 1 -em 10 69 70 0 -em 10 70 69 0 -ej 10 70 1 -em 10 68 69 0 -em 10 69 68  
0 -ej 10 69 1 -em 10 67 68 0 -em 10 68 67 0 -ej 10 68 1 -em 10 66 67 0 -em 10 67 66 0 -ej 10 67 1 -em 10 65 66 0 -em 10 66  
65 0 -ej 10 66 1 -em 10 64 65 0 -em 10 65 64 0 -ej 10 65 1 -em 10 63 64 0 -em 10 64 63 0 -ej 10 64 1 -em 10 62 63 0 -em 10  
63 62 0 -ej 10 63 1 -em 10 61 62 0 -em 10 62 61 0 -ej 10 62 1 -em 10 60 61 0 -em 10 61 60 0 -ej 10 61 1 -em 10 59 60 0 -em  
10 60 59 0 -ej 10 60 1 -em 10 58 59 0 -em 10 59 58 0 -ej 10 59 1 -em 10 57 58 0 -em 10 58 57 0 -ej 10 58 1 -em 10 56 57 0  
-em 10 57 56 0 -ej 10 57 1 -em 10 55 56 0 -em 10 56 55 0 -ej 10 56 1 -em 10 54 55 0 -em 10 55 54 0 -ej 10 55 1 -em 10 53 54  
0 -em 10 54 53 0 -ej 10 54 1 -em 10 52 53 0 -em 10 53 52 0 -ej 10 53 1 -em 10 51 52 0 -em 10 52 51 0 -ej 10 52 1 -em 10 50  
51 0 -em 10 51 50 0 -ej 10 51 1 -em 10 49 50 0 -em 10 50 49 0 -ej 10 50 1 -em 10 48 49 0 -em 10 49 48 0 -ej 10 49 1 -em 10  
47 48 0 -em 10 48 47 0 -ej 10 48 1 -em 10 46 47 0 -em 10 47 46 0 -ej 10 47 1 -em 10 45 46 0 -em 10 46 45 0 -ej 10 46 1 -em  
10 44 45 0 -em 10 45 44 0 -ej 10 45 1 -em 10 43 44 0 -em 10 44 43 0 -ej 10 44 1 -em 10 42 43 0 -em 10 43 42 0 -ej 10 43 1  
-em 10 41 42 0 -em 10 42 41 0 -ej 10 42 1 -em 10 40 41 0 -em 10 41 40 0 -ej 10 41 1 -em 10 39 40 0 -em 10 40 39 0 -ej 10 40  
1 -em 10 38 39 0 -em 10 39 38 0 -ej 10 39 1 -em 10 37 38 0 -em 10 38 37 0 -ej 10 38 1 -em 10 36 37 0 -em 10 37 36 0 -ej 10  
37 1 -em 10 35 36 0 -em 10 36 35 0 -ej 10 36 1 -em 10 34 35 0 -em 10 35 34 0 -ej 10 35 1 -em 10 33 34 0 -em 10 34 33 0 -ej  
10 34 1 -em 10 32 33 0 -em 10 33 32 0 -ej 10 33 1 -em 10 31 32 0 -em 10 32 31 0 -ej 10 32 1 -em 10 30 31 0 -em 10 31 30 0  
-ej 10 31 1 -em 10 29 30 0 -em 10 30 29 0 -ej 10 30 1 -em 10 28 29 0 -em 10 29 28 0 -ej 10 29 1 -em 10 27 28 0 -em 10 28 27  
0 -ej 10 28 1 -em 10 26 27 0 -em 10 27 26 0 -ej 10 27 1 -em 10 25 26 0 -em 10 26 25 0 -ej 10 26 1 -em 10 24 25 0 -em 10 25  
24 0 -ej 10 25 1 -em 10 23 24 0 -em 10 24 23 0 -ej 10 24 1 -em 10 22 23 0 -em 10 23 22 0 -ej 10 23 1 -em 10 21 22 0 -em 10  
22 21 0 -ej 10 22 1 -em 10 20 21 0 -em 10 21 20 0 -ej 10 21 1 -em 10 19 20 0 -em 10 20 19 0 -ej 10 20 1 -em 10 18 19 0 -em  
10 19 18 0 -ej 10 19 1 -em 10 17 18 0 -em 10 18 17 0 -ej 10 18 1 -em 10 16 17 0 -em 10 17 16 0 -ej 10 17 1 -em 10 15 16 0  
-em 10 16 15 0 -ej 10 16 1 -em 10 14 15 0 -em 10 15 14 0 -ej 10 15 1 -em 10 13 14 0 -em 10 14 13 0 -ej 10 14 1 -em 10 12 13  
0 -em 10 13 12 0 -ej 10 13 1 -em 10 11 12 0 -em 10 12 11 0 -ej 10 12 1 -em 10 10 11 0 -em 10 11 10 0 -ej 10 11 1 -em 10 9 10  
0 -em 10 10 9 0 -ej 10 10 1 -em 10 8 9 0 -em 10 9 8 0 -ej 10 9 1 -em 10 7 8 0 -em 10 8 7 0 -ej 10 8 1 -em 10 6 7 0 -em 10 7 6  
0 -ej 10 7 1 -em 10 5 6 0 -em 10 6 5 0 -ej 10 6 1 -em 10 4 5 0 -em 10 5 4 0 -ej 10 5 1 -em 10 3 4 0 -em 10 4 3 0 -ej 10 4 1 -em  
10 2 3 0 -em 10 3 2 0 -ej 10 3 1 -em 10 1 2 0 -em 10 2 1 0 -ej 10 2 1
